# Supplementary material for: Over-Expression of HDA710 Delays Leaf Senescence in Rice (Oryza sativa L.)
Source: PubMed Central journal article supplement (PMC7248171; doi:10.3389/fbioe.2020.00471), 2020-05-19
Supplement: Data_Sheet_1.pdf [file Data_Sheet_1.pdf]

**A**

**InDel I**

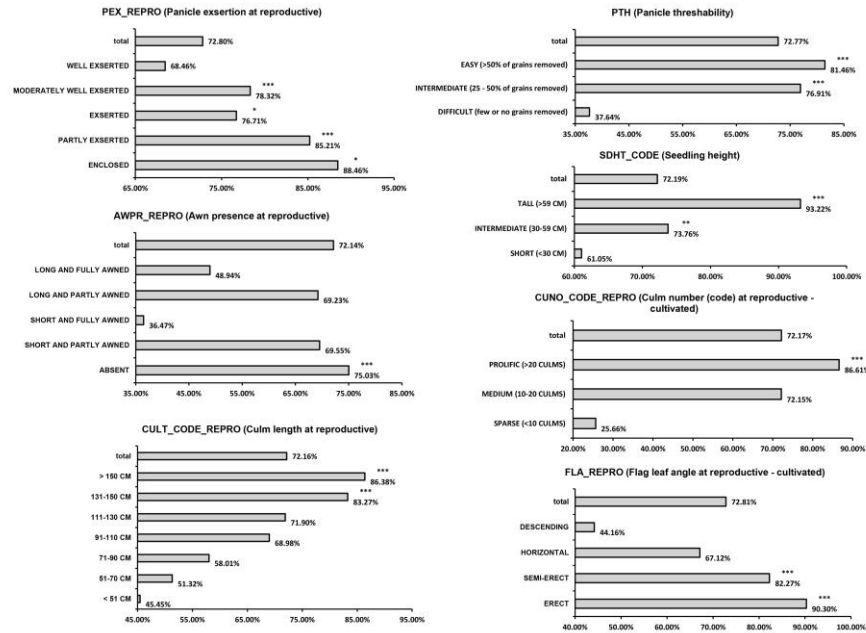

**B**

**InDel II**

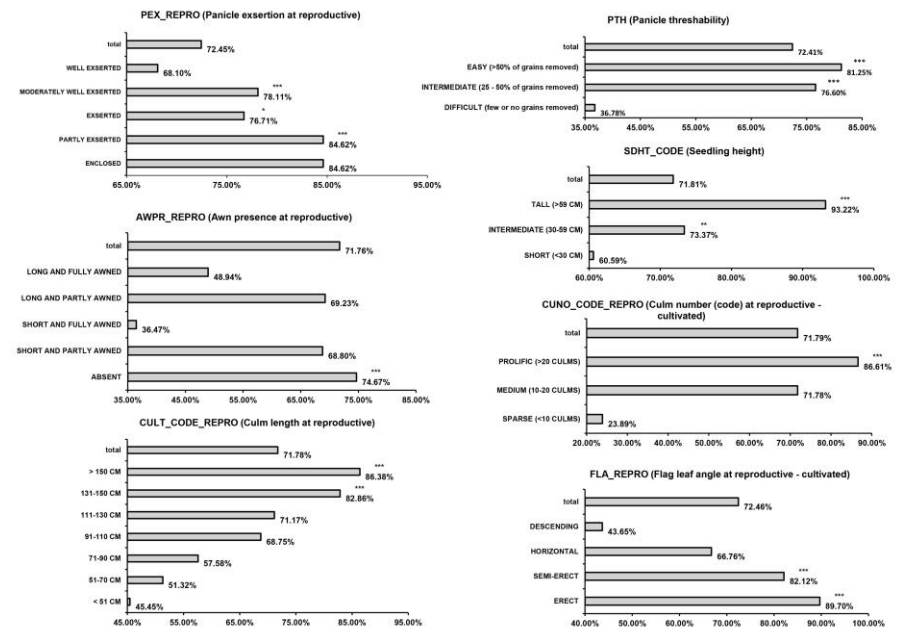

**Figure S1. Phenotype analysis of varieties with InDel I (A) and InDel II (B) in *HDA710* by hypergeometric distribution (\*P<0.05; \*\*P<0.01; \*\*\*P<0.001).**



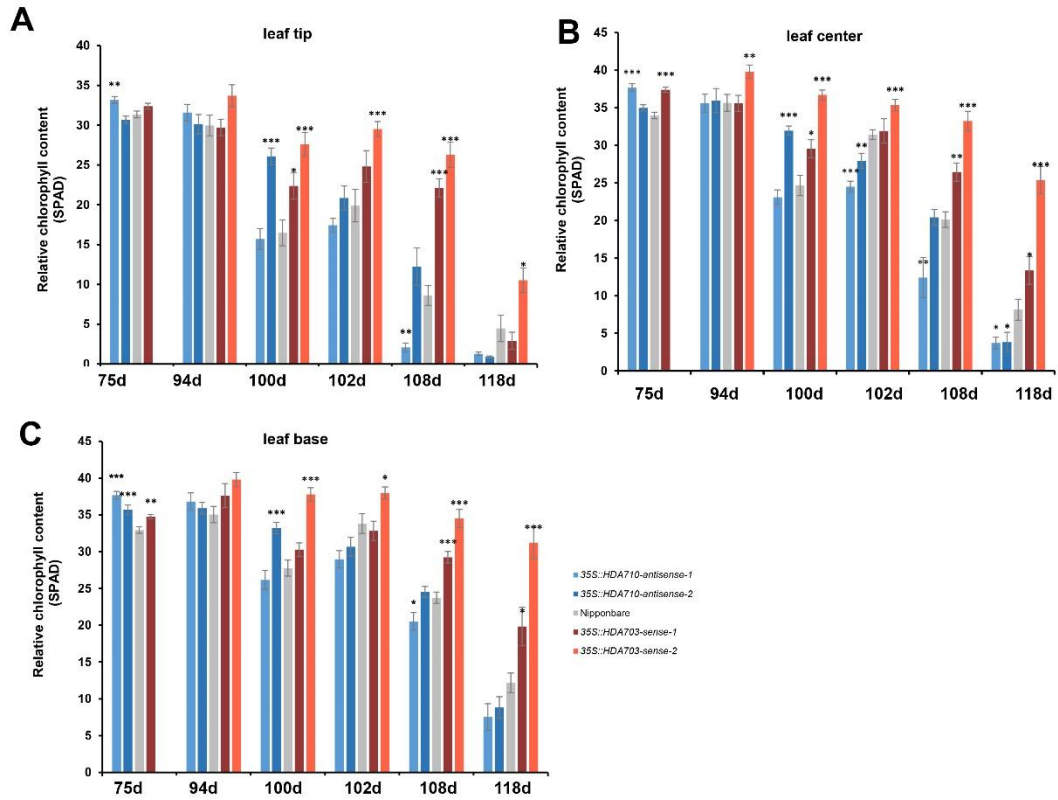

**Figure S3. Chlorophyll content of leaf tip, leaf center and leaf base of flag leaves.** Measurement of chlorophyll content in leaf tips (A), leaf center (B) and leaf base (C) of flag leaves at different growth stages. The asterisks represent the significant difference of Nipponbare, *35S::HDA710-antisense*, and *35S::HDA710-sense* (\* $P < 0.05$ ; \*\* $P < 0.01$ ; \*\*\* $P < 0.001$ ).

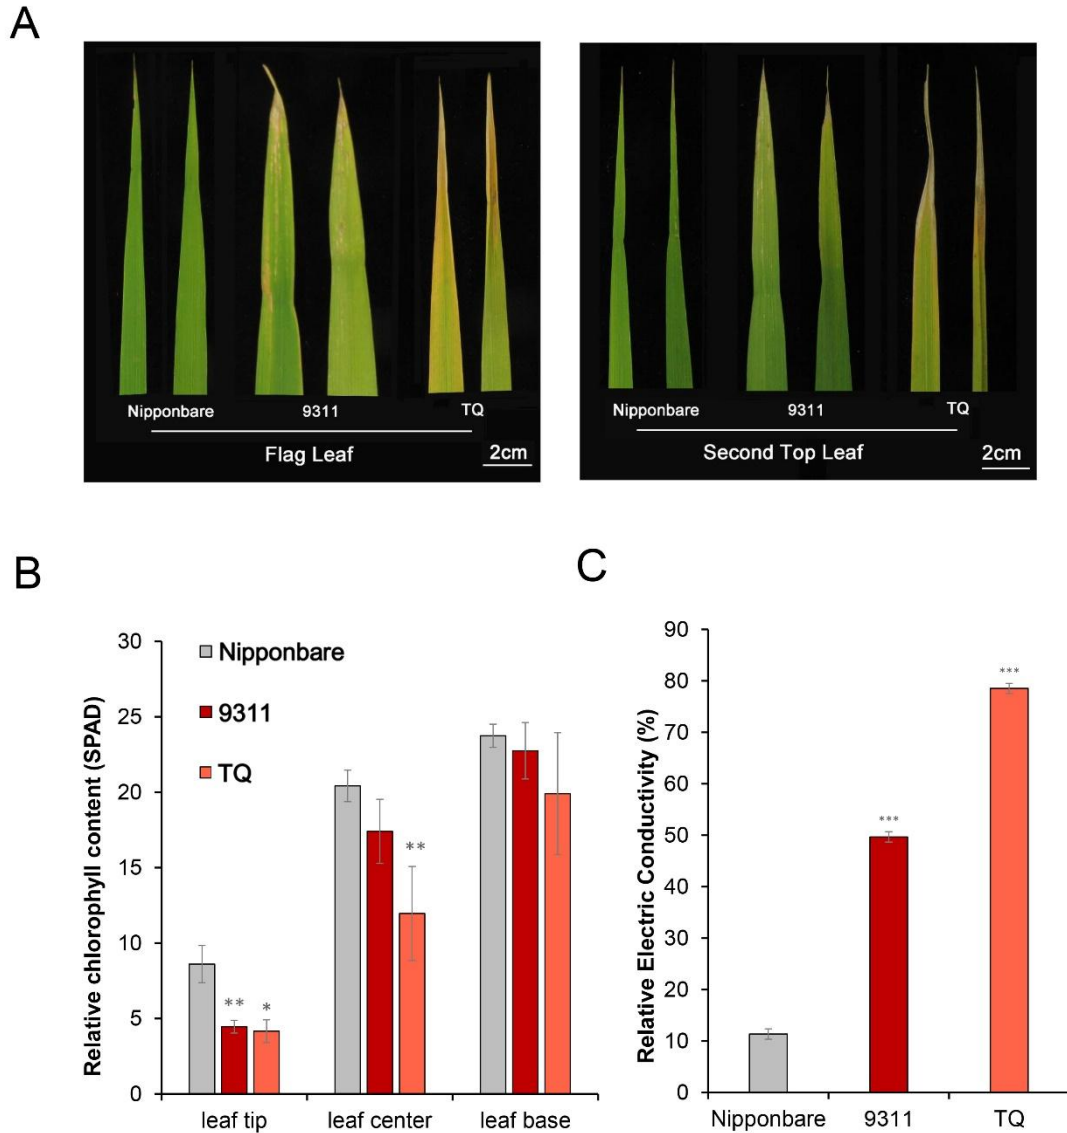

**Figure S4. Phenotypic analysis of Nipponbare, 9311, and TQ.**

(A) Flag leaf and the second top leaf of Nipponbare, 9311 and TQ. (B) Relative chlorophyll content in leaf tip, leaf center and leaf base. (C) Relative electric conductivity of Nipponbare, 9311, and TQ flag leaves at 114 days. The error bars in (B) and (C) represent the standard error of replicates. The asterisks represent the significant difference between Nipponbare, 9311, and TQ (\* $P < 0.05$ ; \*\* $P < 0.01$ ; \*\*\* $P < 0.001$ ).

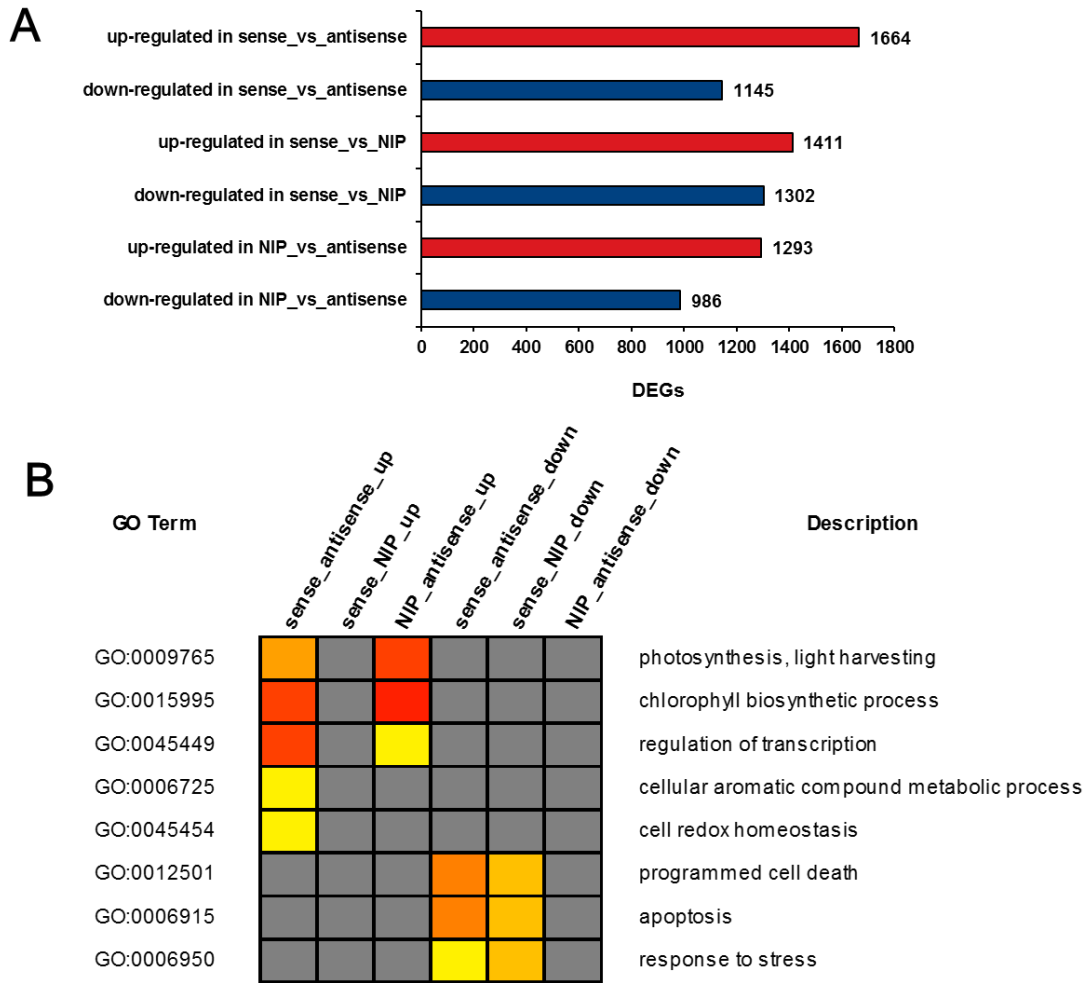

**Figure S5. Comparative analysis of the differentially expressed genes among *35S::HDA710-sense*, *35S::HDA710-antisense*, and Nipponbare (WT).**

(A) Up-regulated and down-regulated genes in *35S::HDA710-sense* compared with *35S::HDA710-antisense*, *35S::HDA710-sense* compared with Nipponbare, and Nipponbare compared with *35S::HDA710-antisense* (fold change >1.7, q-value <0.05). (B) SEACOMPARE analysis of the differentially expressed genes (by agriGO v2.0).

Differentially expressed genes between  
35S::HDA710-sense and antisense (2809)

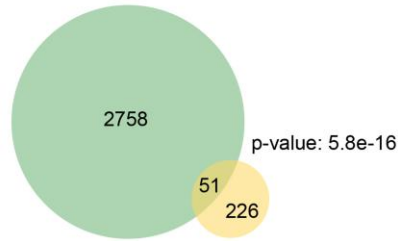

BTH-inducible and WRKY45-  
dependent genes<sup>(a)</sup> (277)

| Locus ID       | 35S::HDA710-sense /antisense |         |          | WRKY45-kd #3 ( 24hr ) <sup>(a)</sup>      |                                                                      |                                           | Description                                         |
|----------------|------------------------------|---------|----------|-------------------------------------------|----------------------------------------------------------------------|-------------------------------------------|-----------------------------------------------------|
|                | Fold change                  | Changed | FDR      | BTH response in UT (BTH/mock fold change) | WRKY45 dependence (BTH-treated UT/BTH-treated WRKY45-kd fold change) | FDR (BTH-responsive and WRKY45-dependent) |                                                     |
| LOC_Os09g25070 | 2.27                         | up      | 3.15E-04 | 227.39                                    | 2.48                                                                 | 1.20E-01                                  | OsWRKY62                                            |
| LOC_Os02g12380 | 488.49                       | up      | 3.15E-04 | 4.49                                      | 2.89                                                                 | 4.54E-02                                  | HDA710                                              |
| LOC_Os10g22310 | 2.26                         | up      | 3.15E-04 | 15.92                                     | 4.71                                                                 | 1.70E-02                                  | OsGSTU35                                            |
| LOC_Os10g38360 | 1.94                         | up      | 3.15E-04 | 12.51                                     | 4.70                                                                 | 7.80E-02                                  | OsGSTU12                                            |
| LOC_Os06g11240 | 1.86                         | up      | 3.15E-04 | 11.02                                     | 3.34                                                                 | 2.84E-02                                  | OsOPR4                                              |
| LOC_Os02g51930 | 2.04                         | up      | 2.54E-02 | 8.02                                      | 15.65                                                                | 1.16E-01                                  | UDP-glucuronosyl                                    |
| LOC_Os08g02030 | 11.73                        | up      | 3.15E-04 | 7.75                                      | 18.76                                                                | 1.48E-02                                  | transferase family protein                          |
| LOC_Os08g26850 | 3.06                         | up      | 3.15E-04 | 7.75                                      | 2.95                                                                 | 1.40E-02                                  | unknown                                             |
| LOC_Os08g26840 | 1.97                         | up      | 3.15E-04 | 7.46                                      | 2.21                                                                 | 1.09E-01                                  | unknown                                             |
| LOC_Os03g57200 | 1.91                         | up      | 1.11E-02 | 6.23                                      | 5.03                                                                 | 1.09E-01                                  | OsGSTU1                                             |
| LOC_Os03g08320 | 2.03                         | up      | 3.15E-04 | 5.67                                      | 2.07                                                                 | 1.41E-01                                  | OsJAZ11                                             |
| LOC_Os11g30760 | 2.72                         | up      | 3.15E-04 | 5.33                                      | 2.09                                                                 | 1.38E-01                                  | expressed protein                                   |
| LOC_Os07g06850 | 3.56                         | up      | 3.15E-04 | 5.11                                      | 2.27                                                                 | 4.70E-02                                  | GID1L2                                              |
| LOC_Os04g51160 | 2.06                         | up      | 3.15E-04 | 4.95                                      | 3.26                                                                 | 1.80E-01                                  | AOX1b                                               |
| LOC_Os02g08440 | 1.88                         | up      | 3.15E-04 | 4.46                                      | 2.24                                                                 | 1.45E-01                                  | OsWRKY71                                            |
| LOC_Os01g60020 | 2.03                         | up      | 3.15E-04 | 3.93                                      | 2.10                                                                 | 9.27E-02                                  | OsNAC4                                              |
| LOC_Os02g04130 | 1.96                         | up      | 1.25E-02 | 3.72                                      | 2.10                                                                 | 5.70E-02                                  | OsSGL                                               |
| LOC_Os09g17560 | 2.83                         | up      | 3.15E-04 | 3.68                                      | 2.85                                                                 | 1.55E-01                                  | ZRP4                                                |
| LOC_Os04g30240 | 1.95                         | up      | 3.15E-04 | 3.66                                      | 4.29                                                                 | 8.26E-02                                  | OsWAK60                                             |
| LOC_Os04g32480 | 2.82                         | up      | 2.56E-02 | 3.27                                      | 2.72                                                                 | 7.62E-02                                  | OsJAZ5                                              |
| LOC_Os11g36000 | 2.04                         | up      | 1.58E-03 | 2.99                                      | 2.61                                                                 | 1.22E-01                                  | receptor-like protein kinase 2 precursor            |
| LOC_Os06g35060 | 3.42                         | up      | 3.15E-04 | 2.89                                      | 2.10                                                                 | 6.55E-02                                  | heavy metal-associated protein                      |
| LOC_Os10g38740 | 1.71                         | up      | 5.94E-04 | 2.82                                      | 2.11                                                                 | 5.06E-02                                  | OsGSTU50                                            |
| LOC_Os01g15320 | 2.64                         | up      | 3.99E-02 | 0.46                                      | 0.40                                                                 | 1.66E-02                                  | RALFL9                                              |
| LOC_Os01g18170 | 4.21                         | up      | 3.15E-04 | 0.39                                      | 0.05                                                                 | 1.66E-01                                  | Cupin domain containing protein                     |
| LOC_Os05g45200 | 2.89                         | up      | 3.15E-04 | 0.34                                      | 0.47                                                                 | 6.47E-02                                  | UDP-glucuronosyl                                    |
| LOC_Os08g32960 | 1.78                         | up      | 1.30E-02 | 0.32                                      | 0.33                                                                 | 1.01E-01                                  | endonuclease/exonuclease/phosphatase family protein |
| LOC_Os06g36040 | 2.18                         | up      | 3.15E-04 | 0.13                                      | 0.50                                                                 | 2.74E-02                                  | expressed protein                                   |
| LOC_Os04g37490 | 0.53                         | down    | 3.15E-04 | 41.67                                     | 5.05                                                                 | 4.53E-02                                  | SRP54                                               |
| LOC_Os02g07170 | 0.31                         | down    | 3.50E-02 | 13.85                                     | 8.63                                                                 | 5.38E-02                                  | MYB family transcription factor                     |
| LOC_Os01g43740 | 0.57                         | down    | 3.15E-04 | 9.88                                      | 16.03                                                                | 7.57E-02                                  | cytochrome P450 72A1                                |
| LOC_Os05g30350 | 0.57                         | down    | 3.15E-04 | 9.67                                      | 5.50                                                                 | 1.51E-02                                  | Os5bglu22                                           |
| LOC_Os06g11290 | 0.58                         | down    | 3.15E-04 | 5.72                                      | 4.01                                                                 | 3.38E-02                                  | OsOPR1                                              |
| LOC_Os03g55050 | 0.46                         | down    | 5.63E-03 | 5.08                                      | 3.31                                                                 | 5.23E-02                                  | UDP-glucuronosyl                                    |
| LOC_Os05g10840 | 0.49                         | down    | 8.57E-04 | 4.96                                      | 2.02                                                                 | 1.53E-01                                  | calmodulin-binding protein                          |
| LOC_Os05g43390 | 0.47                         | down    | 3.15E-04 | 4.90                                      | 2.66                                                                 | 1.62E-01                                  | SRP54                                               |
| LOC_Os02g56370 | 0.54                         | down    | 8.97E-03 | 4.62                                      | 2.45                                                                 | 1.76E-01                                  | OsWAK20                                             |
| LOC_Os08g34790 | 0.45                         | down    | 3.15E-04 | 4.06                                      | 2.80                                                                 | 1.13E-01                                  | Os4CL5                                              |
| LOC_Os12g24650 | 0.20                         | down    | 6.18E-03 | 3.92                                      | 3.43                                                                 | 3.75E-02                                  | chloroplast precursor                               |
| LOC_Os01g49720 | 0.53                         | down    | 4.27E-02 | 3.45                                      | 4.30                                                                 | 5.20E-02                                  | OsGSTU39                                            |
| LOC_Os01g36294 | 0.41                         | down    | 3.15E-04 | 3.45                                      | 2.16                                                                 | 1.85E-01                                  | cytochrome P450                                     |
| LOC_Os08g35600 | 0.47                         | down    | 1.16E-02 | 3.21                                      | 2.34                                                                 | 6.95E-02                                  | tyrosine protein kinase protein                     |
| LOC_Os10g38590 | 0.49                         | down    | 3.15E-04 | 3.21                                      | 2.56                                                                 | 1.40E-01                                  | OsGSTU9                                             |
| LOC_Os03g12890 | 0.49                         | down    | 3.15E-04 | 3.12                                      | 2.08                                                                 | 1.24E-01                                  | aminotransferase protein                            |
| LOC_Os04g05650 | 0.29                         | down    | 3.15E-04 | 3.00                                      | 2.56                                                                 | 1.38E-01                                  | expressed protein                                   |
| LOC_Os01g49710 | 0.28                         | down    | 1.58E-03 | 2.93                                      | 4.14                                                                 | 8.29E-02                                  | OsGSTU40                                            |
| LOC_Os11g44680 | 0.44                         | down    | 3.15E-04 | 2.90                                      | 3.75                                                                 | 5.12E-02                                  | calmodulin binding protein                          |
| LOC_Os12g07310 | 0.51                         | down    | 8.11E-03 | 2.48                                      | 2.43                                                                 | 7.07E-02                                  | citrate-binding protein precursor                   |
| LOC_Os01g49820 | 0.54                         | down    | 3.15E-04 | 2.40                                      | 2.02                                                                 | 3.19E-02                                  | lipid phosphatase protein                           |
| LOC_Os01g03690 | 0.54                         | down    | 3.15E-04 | 2.36                                      | 2.22                                                                 | 4.95E-02                                  | OsRLCK19                                            |
| LOC_Os02g58214 | 0.44                         | down    | 2.15E-02 | 0.50                                      | 0.44                                                                 | 7.91E-03                                  | expressed protein                                   |

(a) The data is from Nakayama et al. BMC Plant Biology 2013, 13:150 (Additional file 1: BTH-inducible and WRKY45-dependent genes).

**Figure S6. Significance analysis of the 2809 differentially expressed genes with 277 BTH-inducible and WRKY45-dependent genes, and the detail information of the 51 overlapping genes.**

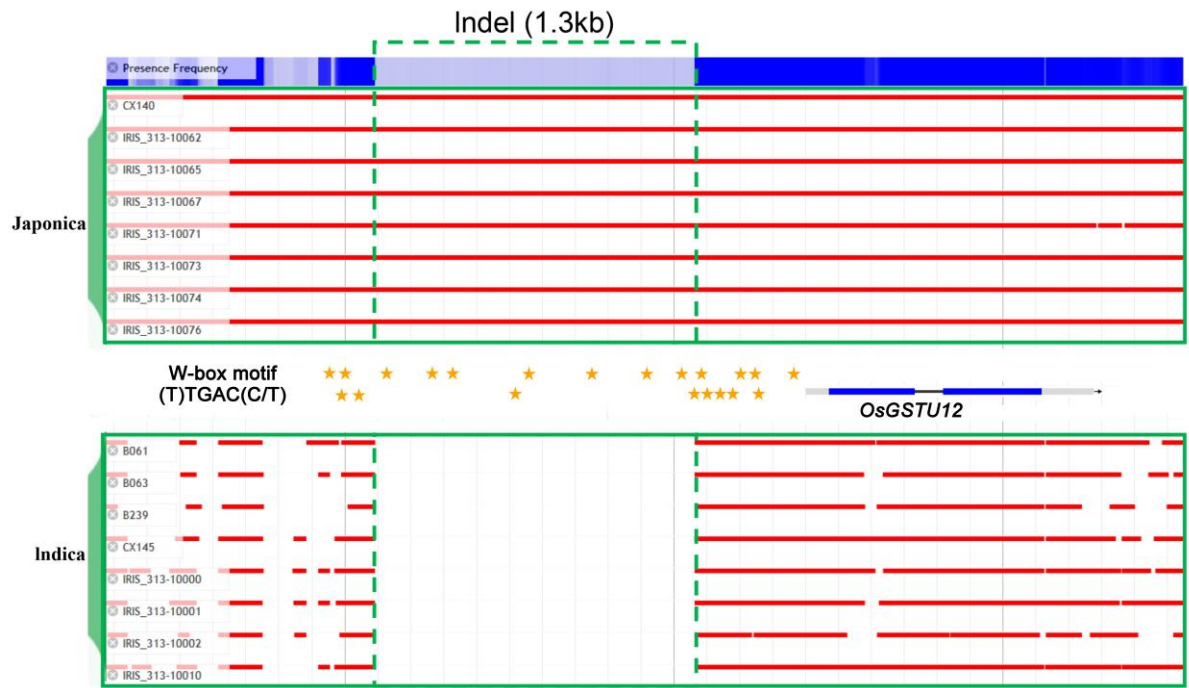

**Figure S7. Natural variation of *OsGSTU12* between *japonica* and *indica* accessions.**

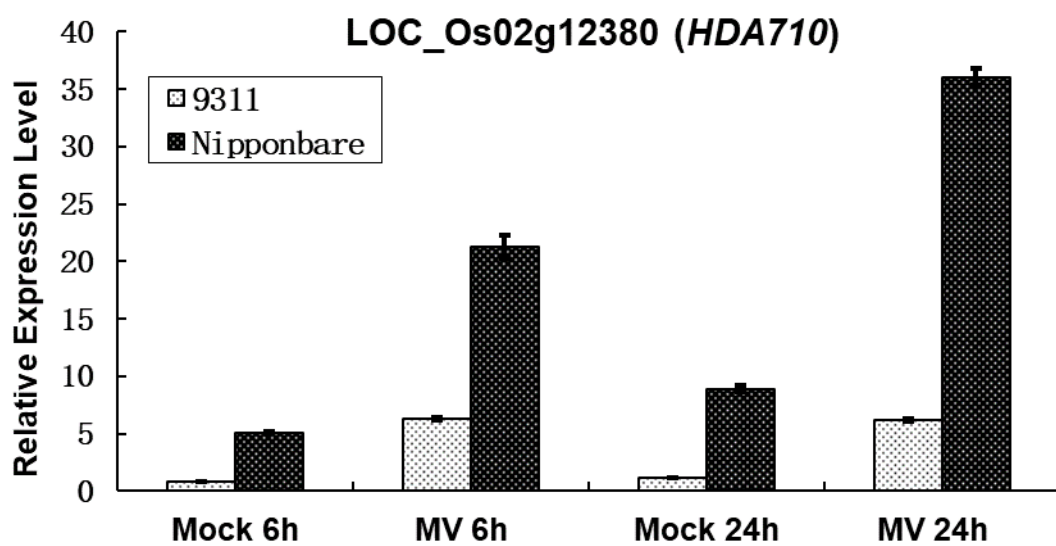

**Figure S8.** qRT-PCR of *HDA710* under normal conditions and MV treatment for 6 h and 24 h.



**Table S1.** The InDels and geographical distribution of 3,010 rice accessions (listed in separated files).

**Table S2.** Expression levels of 18 HDACs in Nipponbare and 9311 under control and MV treatment (listed in separated files).

**Table S3.** One-way ANOVA results for comparisons in Figure 2.

| Comparison                                                                                         |          | df | SS       | MS       | F        | P-value         |
|----------------------------------------------------------------------------------------------------|----------|----|----------|----------|----------|-----------------|
| <b>Figure 2E:</b><br><b>chlorophyll</b><br><b>content for</b><br><b>different lines</b>            | Genotype | 4  | 1.157303 | 0.289326 | 79.80958 | <b>7.30E-14</b> |
|                                                                                                    | error    | 25 | 0.09063  | 0.003625 |          |                 |
|                                                                                                    | Total    | 29 | 1.247933 |          |          |                 |
| <b>Figure 2F:</b><br><b>relative electric</b><br><b>conductivity for</b><br><b>different lines</b> | Genotype | 4  | 464.4593 | 116.1148 | 5.698979 | <b>5.40E-03</b> |
|                                                                                                    | error    | 15 | 305.6201 | 20.37    |          |                 |
|                                                                                                    | Total    |    | 770.0794 |          |          |                 |
|                                                                                                    |          | 19 |          |          |          |                 |

df: degree of freedom; SS: stdev square; MS: mean square

**Table S4.** RNA-seq mapping rates for Nipponbare, *35S:HDA710-sense*, and *35S:HDA710-antisense* lines.

| Sample                            | Reads all | Mapped reads | concordant pair alignment rate |
|-----------------------------------|-----------|--------------|--------------------------------|
| Nipponbare rep1                   | 23835875  | 21756156     | 91.3%                          |
| Nipponbare rep2                   | 25893942  | 23702511     | 91.5%                          |
| Nipponbare rep3                   | 27666295  | 25080401     | 90.7%                          |
| <i>35S::HDA710-sense rep1</i>     | 26722652  | 23979051     | 89.7%                          |
| <i>35S::HDA710-sense rep2</i>     | 21056503  | 18694249     | 88.8%                          |
| <i>35S::HDA710-sense rep3</i>     | 23018568  | 20773662     | 90.2%                          |
| <i>35S::HDA710-antisense rep1</i> | 35292981  | 31878942     | 90.3%                          |
| <i>35S::HDA710-antisense rep2</i> | 19678327  | 17973886     | 91.3%                          |
| <i>35S::HDA710-antisense rep3</i> | 20581258  | 18739364     | 91.1%                          |

**Table S5.** RNA-Seq of *HDA710-antisense*, *HDA710-sense*, and Nipponbare lines (listed in separated files).

**Table S6.** Top 300 co-expressed genes of *HDA710* (listed in separated files).

**Table S7.** Primers for qRT-PCR and vector construction.

| <b>Primer ID</b>                       | <b>Forward</b>                      | <b>Reverse</b>                        |
|----------------------------------------|-------------------------------------|---------------------------------------|
| <i>HDA710</i> -sense (for qRT-PCR)     | AGTACCAGAACCGATGGCAG                | GTTGATGGCCATCGAATTTG                  |
| <i>HDA710</i> -antisense (for qRT-PCR) | AGGCAATACTGGACGTGGAG                | TTCGCCTGAAAGTTCCATCT                  |
| <i>GSTU12</i> (for qRT-PCR)            | ATGAGGGCGTCAAGAGGTT                 | AGCTCGATCAGCTTGTCCAC                  |
| <i>HDA710</i> -sense (for vector)      | GCTCTAGAATGGACCCCTCGTCGGC           | GGGGTACCCTCATACATAAAAACGTAGGAA        |
| <i>HDA710</i> -antisense (for vector)  | GGGGTACCATGGACCCCTCGTCG             | GCTCTAGACTCATACATAAAAACGTAGGAA        |
| <i>OsGSTU12</i> (for vector)           | TCCCCGGGGGACAGAGCTCGCAACT<br>CACAAG | CGGGGTACCCCGAGGGCATAACATGTGCTTC<br>TT |
